# Supplementary material for: Dietary Fat Intake During Adolescence and Breast Density Among Young Women
Source: Oxford University Press journal article supplement (doi:10.1158/1055-9965.epi-15-1146), 2016-05-20
Supplement: 10559965epi151146-sup-157612_1_supp_3315611_t166dl.doc [file 10559965epi151146-sup-157612_1_supp_3315611_t166dl.doc]

| **Supplementary Table 1. Fat intakes at the DISC06 follow-up visit**a | | |
| --- | --- | --- |
| Dietary intakes | *N* | Mean (SD) |
| Total energy intake (kcal/day) | 171 | 1727.9 (472.0) |
| Percentage of energy from |  |  |
| total fat (%) | 171 | 31.2 (6.7) |
| saturated fat (%) | 171 | 10.4 (3.0) |
| monounsaturated fat (%) | 171 | 11.5 (3.0) |
| polyunsaturated fat (%) | 171 | 6.7 (2.0) |
| long-chain omega-3 fat (%) | 171 | 0.09 (0.15) |
| linoleic acid (%) | 171 | 6.0 (2.0) |
| a Among 177 women included in this analysis, dietary intake at the DISC06 follow-up visit was missing in six women. | | |
